# Supplementary material for: Cr2O72− inside Zr/Hf-based metal–organic frameworks: highly sensitive and selective detection and crystallographic evidence
Source: Royal Society of Chemistry journal article supplement (doi:10.1039/d0tc04154h), 2020-01-01
Supplement: d0tc04154h1.pdf [file d0tc04154h1.pdf]

*Electronic Supplementary Information for*

**Cr<sub>2</sub>O<sub>7</sub><sup>2-</sup> inside Zr/Hf-Based Metal–Organic Frameworks: Highly Sensitive and Selective Detection and Crystallographic Evidence**

Kun Wu,<sup>a</sup> Ji Zheng,<sup>a</sup> Yong-Liang Huang,<sup>b</sup> Dong Luo,<sup>a</sup> Yan Yan Li,<sup>a</sup> Weigang Lu<sup>\*a</sup> and Dan Li<sup>\*a</sup>

<sup>a</sup> College of Chemistry and Materials Science, and Guangdong Provincial Key Laboratory of Functional Supramolecular Coordination Materials and Applications, Jinan University, Guangzhou 510632, P. R. China E-mail: weiganglu@jnu.edu.cn; danli@jnu.edu.cn

<sup>b</sup> Department of Chemistry, Shantou University Medical College, Shantou 515041, P. R. China

**Contents**

**Section 1. Structural analysis**

**Section 2. Synthesis of H<sub>4</sub>BTTB**

**Section 3. Crystallographic data**

**Section 4. General characterizations**

**Section 5. Adsorption of Cr<sub>2</sub>O<sub>7</sub><sup>2-</sup>**

**Section 6. Detection of Cr<sub>2</sub>O<sub>7</sub><sup>2-</sup>**

## Section 1. Structural analysis

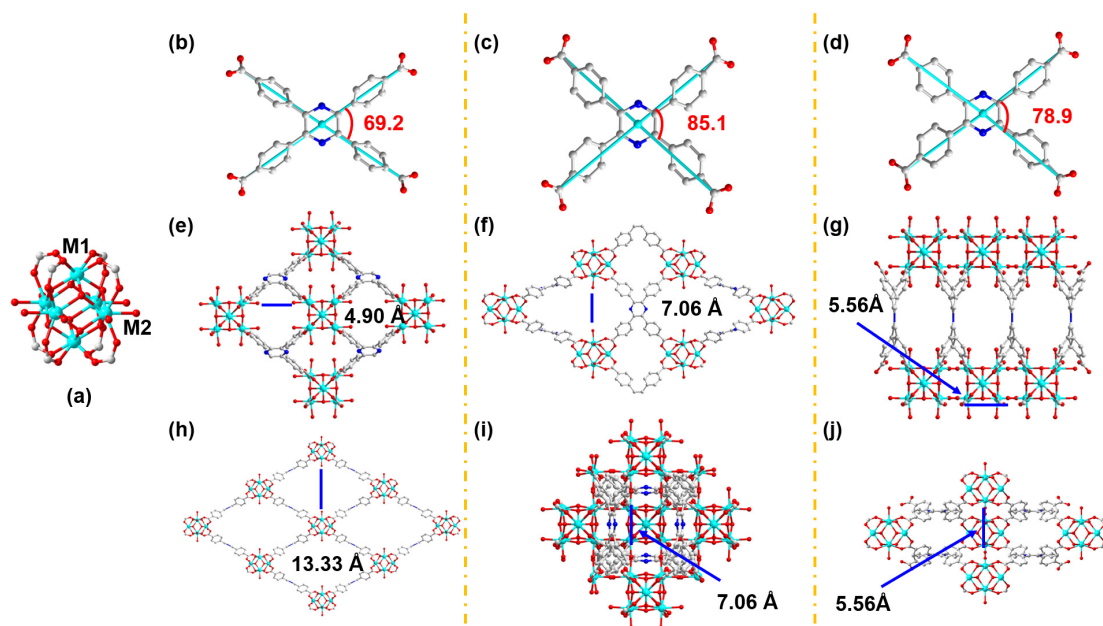

**Fig. S1.** Representation of the crystal structures of Zr/Hf-MOF-1, -2 and -3. (a) The cluster of Zr/Hf-O. The different torsional angles of the linkers in (b) Zr/Hf-MOF-1, (c) Zr/Hf-MOF-2, and (d) Zr/Hf-MOF-3. Crystal structures of (e) Zr/Hf-MOF-1, (f) Zr/Hf-MOF-2, and (g) Zr/Hf-MOF-3 viewed along [010] direction. Crystal structures of (h) Zr/Hf-MOF-1, (i) Zr/Hf-MOF-2, and (j) Zr/Hf-MOF-3 viewed along [001] direction.

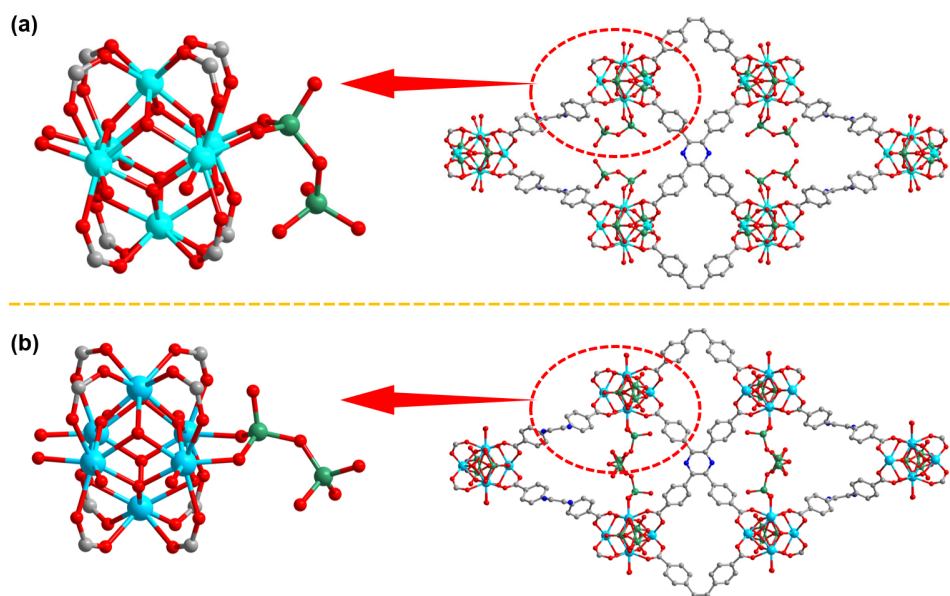

**Fig. S2.** Representation of the coordination environments of Zr<sub>6</sub>/Hf<sub>6</sub> clusters in Zr/Hf-MOF-2-Cr<sub>2</sub>O<sub>7</sub><sup>2-</sup> viewed along [010] direction, (a) Zr-MOF-2-Cr<sub>2</sub>O<sub>7</sub><sup>2-</sup> and (b) Hf-MOF-2-Cr<sub>2</sub>O<sub>7</sub><sup>2-</sup>. (Colour code: C, gray; O, red; and Zr, turquoise; Hf, shy blue; Cr, green; One set of disorder Cr<sub>2</sub>O<sub>7</sub><sup>2-</sup> and H atoms are omitted in each structure for clarity).

## Section 2. Synthesis of H<sub>4</sub>BTTB

### 4,4',4'',4'''benzene-1,2,4,5-tetrayltetrabenzoic acid (short for H<sub>4</sub>BTTB).<sup>1</sup>

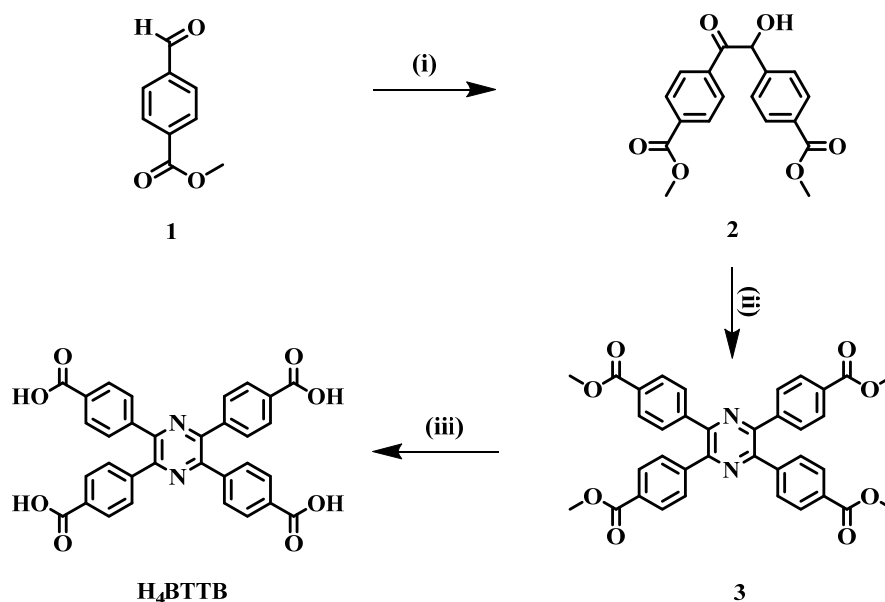

**Scheme S1.** The synthesis of ligand H<sub>4</sub>BTTB: (i) MeOH, H<sub>2</sub>O, VB<sub>1</sub>, 2M NaOH; (ii) CH<sub>3</sub>COOH, (CH<sub>3</sub>CO)<sub>2</sub>O, CH<sub>3</sub>COONH<sub>4</sub>; (iii) NaOH, THF/H<sub>2</sub>O.

### Synthesis of 2

To a solution of VB<sub>1</sub> (6.0 g, 20 mmol) in the mixed solvent of CH<sub>3</sub>OH (90 mL) and H<sub>2</sub>O (30 mL), add NaOH (16.6 mL, 2 M) dropwise to adjust the pH to 9–10. then **1** (50.0 g, 305 mmol) was added. The resulting mixture was stirred for 1 h in ice bath, then it was heated at 60 °C for 1 h and at 85 °C for 3 h. The precipitate was filtered to produce **2**. <sup>1</sup>H NMR (400 MHz, CDCl<sub>3</sub>): δ = 8.08 (dt, 2H), 8.01 (dt, 2H), δ = 7.95 (dt, 2H), δ = 7.42 (dt, 2H), δ = 3.94 (s, 3H), δ = 3.90 (s, 3H).

### Synthesis of 3

To a solution of **2** (30.1 g, 91.7 mmol) and CH<sub>3</sub>COONH<sub>4</sub> (12 g, 155.7 mmol) in 90 mL of CH<sub>3</sub>COOH, add acetic anhydride (9 mL, 91.7 mmol). After being stirred for 12 h at 120 °C under N<sub>2</sub>, the dark orange precipitate was filtered and washed with diethyl ether to afford **3** (20.0 g, 32.5 mmol). <sup>1</sup>H NMR (400 MHz, CDCl<sub>3</sub>): δ = 8.03 (d, 8H), 7.71 (d, 8H), 3.96 (s, 12H).

### Synthesis of H<sub>4</sub>BTTB

To a solution of **3** (20.0 g, 32.5 mmol) in THF/H<sub>2</sub>O (1:1, 250 mL), add NaOH (20.0 g, 500. mmol), the resulting mixture was refluxed for 12 h. THF was removed in vacuum, and the remaining solution was acidified to pH of ca. 3 with HCl (2.0 M). The precipitate was filtered and washed with distilled water to afford H<sub>4</sub>BTTB as a light-yellow solid (16.18 g, 28.9 mmol). <sup>1</sup>H NMR (400 MHz, DMSO-d<sub>6</sub>): δ = 13.10 (br, 4H), 7.94 (d, J = 8.4 Hz, 8H), 7.68 (d, J = 8.4 Hz, 8H). IR (cm<sup>-1</sup>): 3453(w), 3002(m), 2657(w), 2526(w), 1941(w), 1702(s), 1608(m), 1569(m), 1511(m), 1388(3), 1317(w), 1176(m), 1010(m), 1106(m), 860(m), 775(m), 717(m), 622(w), 543(m).

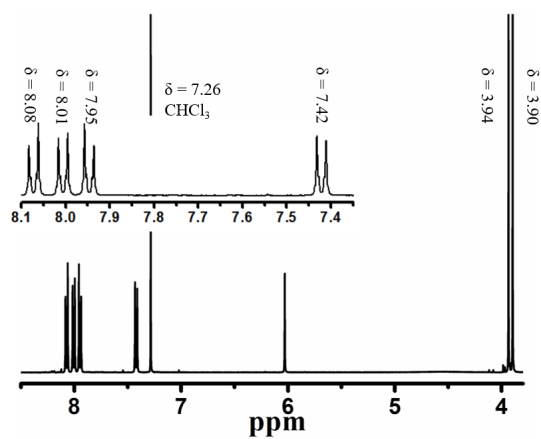

Fig. S3.  $^1\text{H}$  NMR of 2.

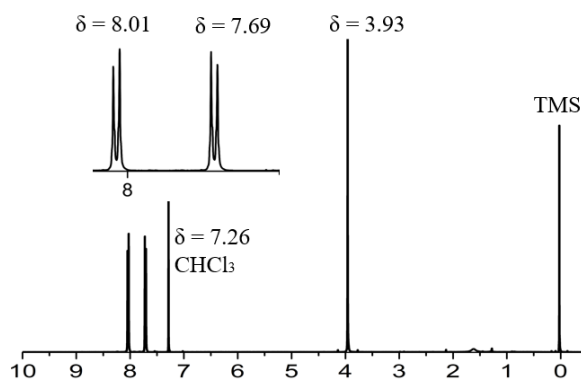

Fig. S4.  $^1\text{H}$  NMR of 3.

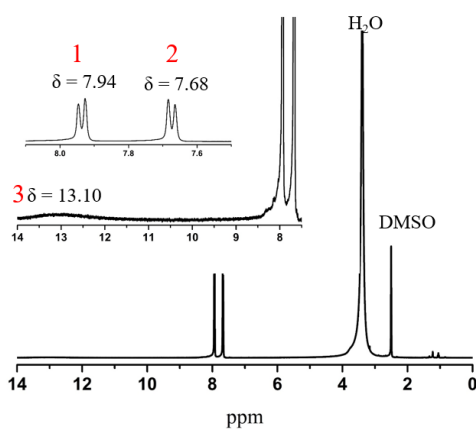

Fig. S5.  $^1\text{H}$  NMR of H<sub>4</sub>BTTB.

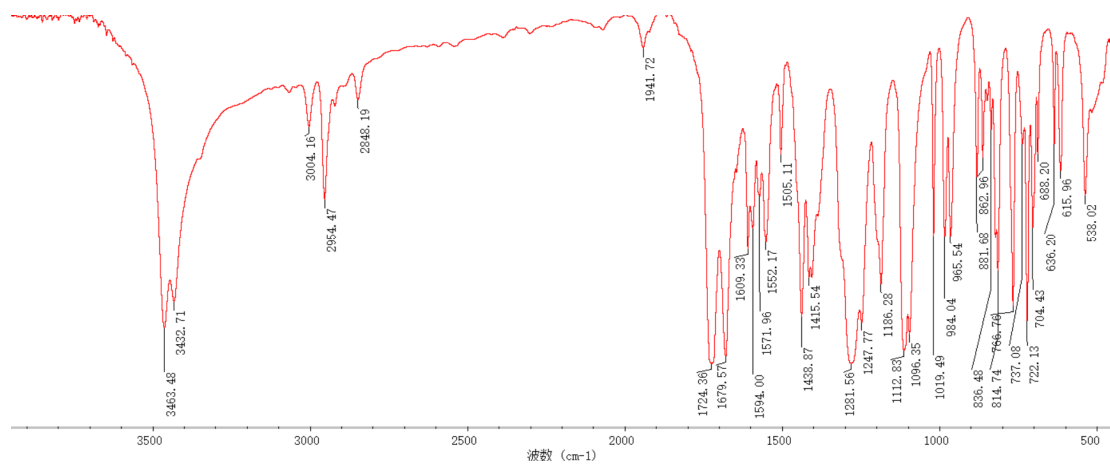

**Fig. S6.** FT-IR spectra of **2**.

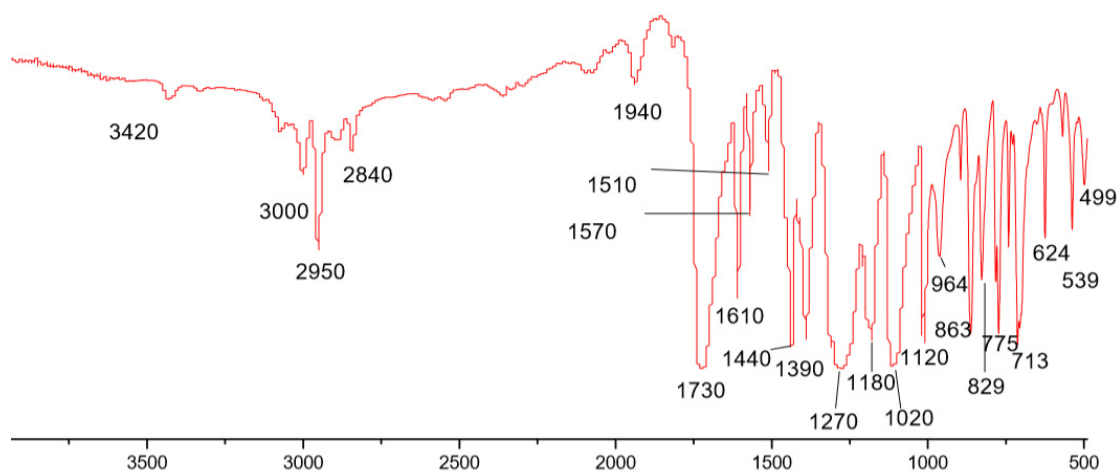

**Fig. S7.** FT-IR spectra of **3**.

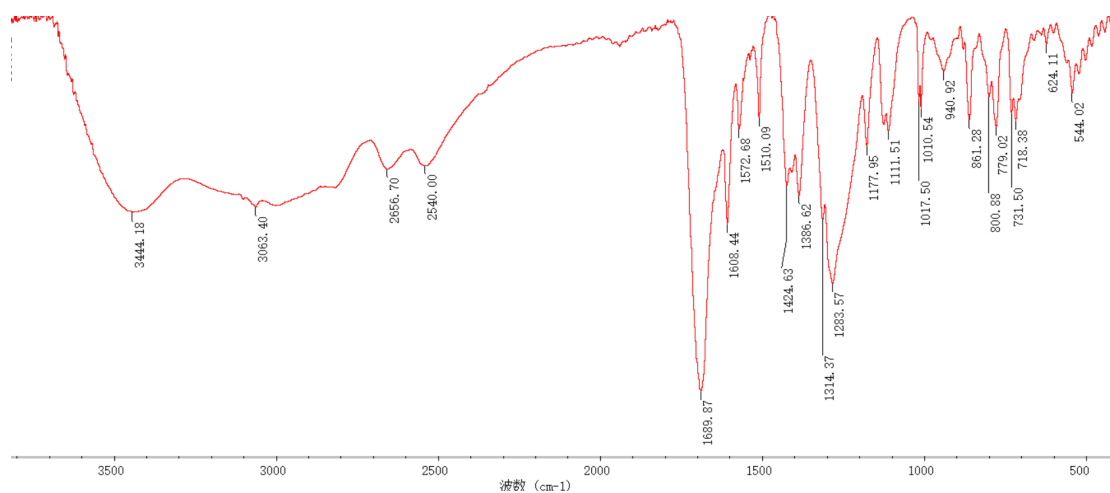

**Fig. S8.** FT-IR spectra of H<sub>4</sub>BTTB.

### Synthesis of Hf-MOF-1

Hf-MOF-1 was obtained through the solvothermal reaction of HfCl<sub>4</sub> (432 mg, 1.35 mmol) and H<sub>4</sub>BTTB (200 mg, 0.035 mmol) in DMF (300 mL) in the presence of benzoic acid (34 g, 0.278 mmol) for 3 days at 120 °C. The mixture was then cooled down to room temperature. Colourless microcrystals were obtained and filtered, washed with solvents (DMF and acetone), and dried in an oven at 80 °C (yield 50%, based on H<sub>4</sub>BTTB). Elemental analysis (%) for Hf-MOF-1: C, 40.79; H, 3.25; N, 3.39, found: C, 40.23; H, 3.31; N, 3.51.

### Synthesis of Zr-MOF-1

Zr-MOF-1 was obtained through the reaction of Zr(NO<sub>3</sub>)<sub>4</sub>·5H<sub>2</sub>O (580 mg, 1.35 mmol) and H<sub>4</sub>BTTB (400 mg, 0.71 mmol) in DMF (150 mL) in the presence of HCOOH (140 mL) for 3 days at 140 °C. The mixture was then cooled down to room temperature. Colourless microcrystals were obtained and filtered, washed with solvents (DMF and acetone), and dried in an oven at 80 °C (62%, based on H<sub>4</sub>BTTB). Elemental analysis (%) for Zr-MOF-1: C, 44.78; H, 2.832; N, 2.7, found: C, 45.17; H, 3.07; N, 2.91. The same crystal structure has been previously reported.<sup>2</sup>

### Synthesis of Zr-MOF-2

A mixture of ZrOCl<sub>2</sub>·8H<sub>2</sub>O (2.250 g, 6.98 mmol), H<sub>4</sub>BTTB (1.245 g, 2.22 mmol), and DMF/HCOOH (870 mL, 15/14, v/v) were added in a round-bottomed flask and heated in an oil bath (without stirring) under reflux at 130 °C for 72 h. After cooling to room temperature, the white polyhedron single crystals were obtained by filtration and washed with DMF 3 times (20.0 mL each time). Then, the crystals were soaked in acetone (40 mL) for 3 days at room temperature, when fresh solvents were exchanged every 8 h. The sample was collected by filtration and dried in air (yield 65%, based on H<sub>4</sub>BTTB), which was determined as [Zr<sub>6</sub>(μ<sub>3</sub>-O)<sub>4</sub>(μ<sub>3</sub>-OH)<sub>4</sub>(OH)<sub>4</sub>(H<sub>2</sub>O)<sub>4</sub>(BTTB)<sub>2</sub>]. Elemental analysis (%) for Zr-MOF-2: C, 43.09; H, 5.06; N, 4.41; found: C, 43.18; H, 5.10; N, 4.49. The same crystal structure has been previously reported.<sup>2-4</sup>

### Synthesis of Zr-MOF-2'

To the filtrate of the mother liquor from the synthesis of Zr-MOF-2, add ZrOCl<sub>2</sub>·8H<sub>2</sub>O (2.250 g, 6.98 mmol) and H<sub>4</sub>BTTB (1.245 g, 2.22 mmol). The resulting mixture was subjected to the same reaction condition and workup as for Zr-MOF-2. Microcrystalline Zr-MOF-2' was obtained (yield 68%, based on H<sub>4</sub>BTTB). PXRD studies indicated that Zr-MOF-2' has the same structure as Zr-MOF-2. Notably, the DMF/HCOOH filtrate can be recycled to produce microcrystalline Zr-MOF-2' several times with good yields.

**Synthesis of Zr-MOF-2-Cr<sub>2</sub>O<sub>7</sub><sup>2-</sup>** The as-synthesized Zr-MOF-2 samples (20 mg) were soaked in 5 mM Cr<sub>2</sub>O<sub>7</sub><sup>2-</sup> aqueous solutions at room temperature for 4 d. Then, the samples were collected by filtration, washed with water before SCXRD and PXRD investigations.

### Synthesis of Hf-MOF-3

HfOCl<sub>2</sub>·8H<sub>2</sub>O (51 mg, 0.124 mmol), H<sub>4</sub>BTTB (100 mg, 0.179 mmol), DMF (15 mL), and HCOOH (14 mL) were added into a round-bottomed flask and heated in an oil bath

(no stirring) under reflux at 130 °C for 7 d. After cooling to room temperature, the white polyhedron single crystals were obtained by filtration and washed with DMF for 3 times. Then, the crystals were soaked in acetone (40 mL) for 3 days at room temperature. The sample was collected by filtration and dried in air (yield 53%, based on H<sub>4</sub>BTTB), which was determined as [Hf<sub>6</sub>(μ<sub>3</sub>-O)<sub>4</sub>(μ<sub>3</sub>-OH)<sub>4</sub>(OH)<sub>4</sub>(H<sub>2</sub>O)<sub>4</sub>(BTTB)<sub>2</sub>]<sub>9</sub> DMF·3.5 H<sub>2</sub>O. Elemental analysis (%) for Hf-MOF-3: C, 43.24; H, 5.10; N, 4.52; found: C, 43.50; H, 5.17; N, 4.61.

### Synthesis of Zr-MOF-3

A mixture of ZrOCl<sub>2</sub>·8H<sub>2</sub>O (40 mg, 0.124 mmol), H<sub>4</sub>BTTB (100 mg, 0.179 mmol), DMF (15 mL), and HCOOH (14mL) was added into a round-bottomed flask and heated in an oil bath (no stirring) under reflux at 130 °C for 7 d. After cooling to room temperature, colourless single crystals were obtained by filtration and washed with DMF 3 times. Then, the crystals were soaked in acetone (40 mL) for 3 days at room temperature. The sample was collected by filtration and dried in air (yield 60%, based on H<sub>4</sub>BTTB), which was determined as [Zr<sub>6</sub>(μ<sub>3</sub>-O)<sub>4</sub>(μ<sub>3</sub>-OH)<sub>4</sub>(OH)<sub>4</sub>(H<sub>2</sub>O)<sub>4</sub>(BTTB)<sub>2</sub>]<sub>9</sub> DMF·3.5 H<sub>2</sub>O. Elemental analysis (%) for Zr-MOF-3 calculated: C, 43.4; H, 3.425; N, 2.52; found: C, 43.05; H, 3.61; N, 2.64. The crystal structure has been previously reported.<sup>4</sup>

### Determination of the Crystal Structures

Single-crystal X-ray diffraction data of Hf-MOF-2, Hf-MOF-3, Zr-MOF-2, Zr-MOF-3, Zr-MOF-2-Cr<sub>2</sub>O<sub>7</sub><sup>2-</sup> and Hf-MOF-2-Cr<sub>2</sub>O<sub>7</sub><sup>2-</sup> were collected *via* an Oxford Cryo stream system on a XtaLAB PRO MM007-DW diffractometer system equipped with a RA-Micro7HF-MR-DW(Cu/Mo) X-ray generator and Pilatus3R-200K-A detector (Rigaku, Japan, Cu Kα, λ = 1.54178 Å) at 100(2) K. The numerical absorption corrections were applied using the program of ABSCOR. The structures were solved using direct methods, which yielded the positions of all non-hydrogen atoms, and they were refined anisotropically. Hydrogen atoms were placed in calculated positions with fixed isotropic thermal parameters and included in the structure factor calculations in the final stage of full-matrix least-squares refinement. All calculations were performed using the SHELXTL system of computer programs. The unit cell volume included a large region of disordered solvent which could not be modelled as discrete atomic sites. The treatment for the guest molecules in the cavities of all crystals involves the use of the SQUEEZE program of PLATON. Crystal data and structure refinement parameters are summarized in Tables S2-S3. Topology information for the Zr/Hf-MOFs was calculated by TOPOS 4.0.35.

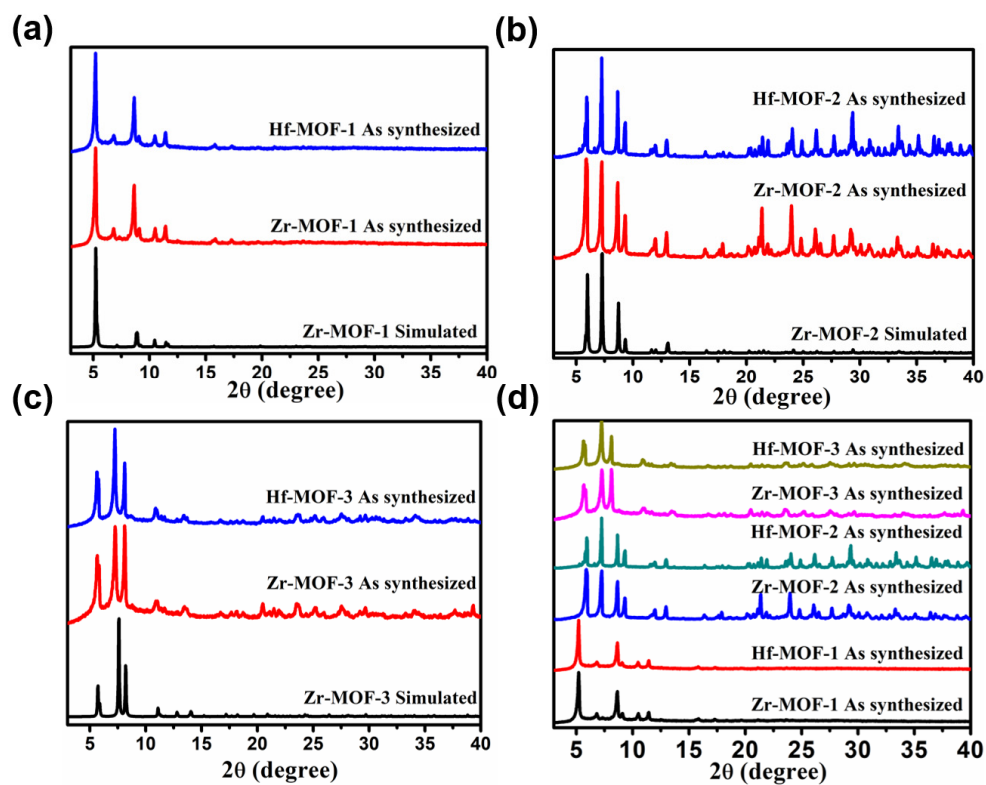

**Fig. S9.** PXRD patterns of (a) Zr/Hf-MOF-1, (b) Zr/Hf-MOF-2, and (c) Zr/Hf-MOF-3. (d) Comparison of PXRD patterns of the six as-synthesized MOFs.

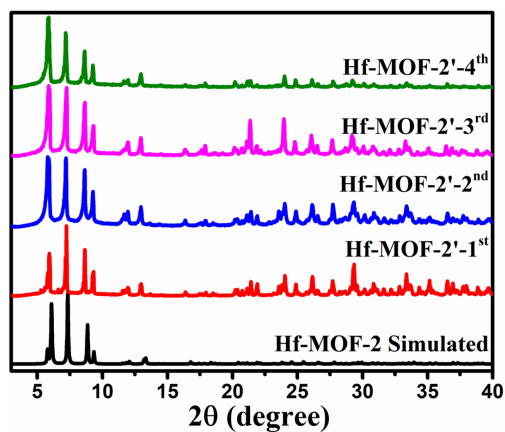

**Fig. S10.** Comparison of PXRD patterns of Hf-MOF-2 (simulated) and Hf-MOF-2' (1<sup>st</sup>, 2<sup>nd</sup>, 3<sup>rd</sup>, 4<sup>th</sup>) synthesized with the recycled mother liquor four times.



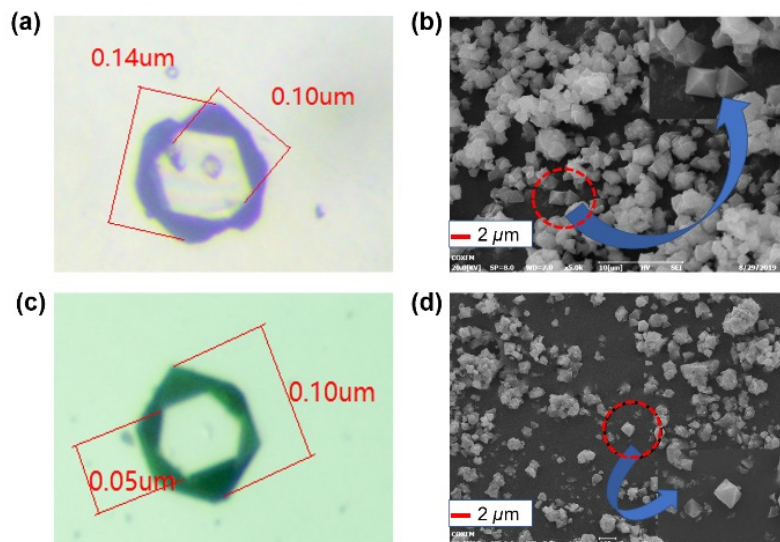

**Fig. S11.** Optical images of the (a) Hf-MOF-2 and (c) Zr-MOF-2. Desktop SEM images of (b) Hf-MOF-2' and (d) Zr-MOF-2'.

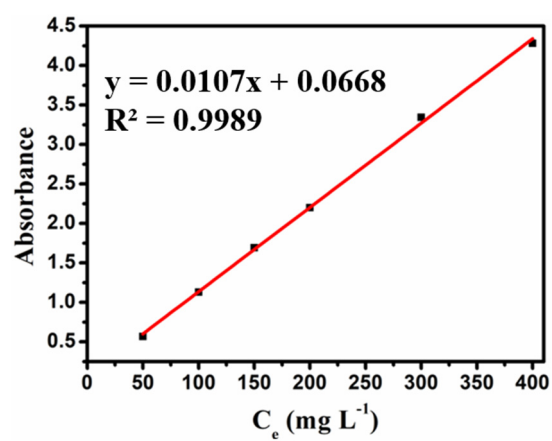

**Fig. S12.** UV-Vis absorption standard curve for  $\text{Cr}_2\text{O}_7^{2-}$  in aqueous solution.

### Section 3. Crystallographic data

**Table S1.** Crystal data and structure refinement for Hf-MOFs.

| MOF                                                                    | Hf-MOF-2                                                                       | Hf-MOF-3                                                                       | Hf-MOF-2- Cr <sub>2</sub> O <sub>7</sub> <sup>2-</sup>                                               |
|------------------------------------------------------------------------|--------------------------------------------------------------------------------|--------------------------------------------------------------------------------|------------------------------------------------------------------------------------------------------|
| Empirical formula                                                      | C <sub>32</sub> H <sub>24</sub> Hf <sub>3</sub> N <sub>2</sub> O <sub>16</sub> | C <sub>32</sub> H <sub>28</sub> Hf <sub>3</sub> N <sub>2</sub> O <sub>16</sub> | C <sub>32</sub> H <sub>20</sub> Cr <sub>0.75</sub> Hf <sub>3</sub> N <sub>2</sub> O <sub>17.75</sub> |
| Formula weight                                                         | 1228.00                                                                        | 1232                                                                           | 1290.97                                                                                              |
| Crystal system                                                         | tetragonal                                                                     | orthorhombic                                                                   | tetragonal                                                                                           |
| Space group                                                            | <i>I4<sub>1</sub>/amd</i>                                                      | <i>Fmmm</i>                                                                    | <i>I4<sub>1</sub>/amd</i>                                                                            |
| a/ Å                                                                   | 14.92550(10)                                                                   | 13.3952(3)                                                                     | 15.08800(10)                                                                                         |
| b/ Å                                                                   | 14.92550(10)                                                                   | 30.9940(4)                                                                     | 15.08800(10)                                                                                         |
| c/ Å                                                                   | 61.0560(6)                                                                     | 30.0265(4)                                                                     | 60.1315(10)                                                                                          |
| V/ Å <sup>3</sup>                                                      | 13601.5(2)                                                                     | 12466.1(4)                                                                     | 13688.8(3)                                                                                           |
| Z                                                                      | 8                                                                              | 8                                                                              | 8                                                                                                    |
| D <sub>C</sub> /g cm <sup>-3</sup>                                     | 1.199                                                                          | 1.313                                                                          | 1.253                                                                                                |
| μ /mm <sup>-1</sup>                                                    | 8.593                                                                          | 9.376                                                                          | 9.503                                                                                                |
| λ / Å                                                                  | 1.54184                                                                        | 1.54184                                                                        | 1.54184                                                                                              |
| T/ K                                                                   | 100                                                                            | 100                                                                            | 100                                                                                                  |
| Reflections collected                                                  | 20579                                                                          | 11175                                                                          | 24012                                                                                                |
| Independent reflections                                                | 3879 [R <sub>int</sub> = 0.0345]                                               | 3423 [R <sub>int</sub> = 0.0418]                                               | 3844 [R <sub>int</sub> = 0.0290]                                                                     |
| Goodness-of-fit on F <sup>2</sup>                                      | 1.073                                                                          | 1.090                                                                          | 1.139                                                                                                |
| R <sub>1</sub> <sup>a</sup> , wR <sub>2</sub> <sup>b</sup> [I > 2σ(I)] | R <sub>1</sub> = 0.0345, wR <sub>2</sub> = 0.1098                              | R <sub>1</sub> = 0.0434, wR <sub>2</sub> = 0.1199                              | R <sub>1</sub> = 0.0464, wR <sub>2</sub> = 0.1398                                                    |
| R <sub>1</sub> <sup>a</sup> , wR <sub>2</sub> <sup>b</sup> (all data)  | R <sub>1</sub> = 0.0385, wR <sub>2</sub> = 0.1106                              | R <sub>1</sub> = 0.0456, wR <sub>2</sub> = 0.1222                              | R <sub>1</sub> = 0.0480, wR <sub>2</sub> = 0.1420                                                    |
| Largest diff. peak and hole /e.Å <sup>-3</sup>                         | 1.47/-1.76                                                                     | 3.46/-1.99                                                                     | 1.61/-1.54                                                                                           |

$$^a R_1 = \frac{\sum ||F_o| - |F_c||}{\sum |F_o|}$$

$$^b wR_2 = \left\{ \frac{\sum [w(F_o^2 - F_c^2)^2]}{\sum [w(F_o^2)^2]} \right\}^{1/2}, [F_o > 4\sigma(F_o)]$$

**Table S2.** Crystal data and structure refinement for Zr-MOFs.

| MOF                                                                    | Zr-MOF-2                                                                       | Zr-MOF-3                                                                       | Zr-MOF-2- Cr <sub>2</sub> O <sub>7</sub> <sup>2-</sup>                                               |
|------------------------------------------------------------------------|--------------------------------------------------------------------------------|--------------------------------------------------------------------------------|------------------------------------------------------------------------------------------------------|
| Empirical formula                                                      | C <sub>32</sub> H <sub>24</sub> N <sub>2</sub> O <sub>16</sub> Zr <sub>3</sub> | C <sub>32</sub> H <sub>28</sub> N <sub>2</sub> O <sub>16</sub> Zr <sub>3</sub> | C <sub>32</sub> H <sub>18</sub> Cr <sub>0.75</sub> N <sub>2</sub> O <sub>17.15</sub> Zr <sub>3</sub> |
| Formula weight                                                         | 966.19                                                                         | 972.22                                                                         | 1017.54                                                                                              |
| Crystal system                                                         | tetragonal                                                                     | orthorhombic                                                                   | tetragonal                                                                                           |
| Space group                                                            | <i>I4<sub>1</sub>/amd</i>                                                      | <i>Fmmm</i>                                                                    | <i>I4<sub>1</sub>/amd</i>                                                                            |
| a/ Å                                                                   | 15.20200(10)                                                                   | 13.8240(3)                                                                     | 15.11968(7)                                                                                          |
| b/ Å                                                                   | 15.20200(10)                                                                   | 13.8240(3)                                                                     | 15.11968(7)                                                                                          |
| c/ Å                                                                   | 60.5990(8)                                                                     | 30.9041(6)                                                                     | 60.2341(5)                                                                                           |
| V/ Å <sup>3</sup>                                                      | 14004.5(3)                                                                     | 12466.1(4)                                                                     | 13769.80(17)                                                                                         |
| Z                                                                      | 8                                                                              | 8                                                                              | 8                                                                                                    |
| D <sub>c</sub> /g cm <sup>-3</sup>                                     | 1.874                                                                          | 1.004                                                                          | 0.982                                                                                                |
| μ/mm <sup>-1</sup>                                                     | 9.328                                                                          | 4.300                                                                          | 4.957                                                                                                |
| λ/ Å                                                                   | 1.54184                                                                        | 1.54184                                                                        | 1.54184                                                                                              |
| T/ K                                                                   | 100                                                                            | 100                                                                            | 100                                                                                                  |
| Reflections collected                                                  | 16566                                                                          | 11989                                                                          | 44052                                                                                                |
| Independent reflections                                                | 3619 [R <sub>int</sub> = 0.0248]                                               | 3122 [R <sub>int</sub> = 0.0723]                                               | 3158 [R <sub>int</sub> = 0.0299]                                                                     |
| Goodness-of-fit on F <sup>2</sup>                                      | 1.086                                                                          | 1.090                                                                          | 1.123                                                                                                |
| R <sub>1</sub> <sup>a</sup> , wR <sub>2</sub> <sup>b</sup> [I > 2σ(I)] | R <sub>1</sub> = 0.0391, wR <sub>2</sub> = 0.1217                              | R <sub>1</sub> = 0.0669, wR <sub>2</sub> = 0.1856                              | R <sub>1</sub> = 0.0913, wR <sub>2</sub> = 0.3234                                                    |
| R <sub>1</sub> <sup>a</sup> , wR <sub>2</sub> <sup>b</sup> (all data)  | R <sub>1</sub> = 0.0415, wR <sub>2</sub> = 0.1258                              | R <sub>1</sub> = 0.0722, wR <sub>2</sub> = 0.1903                              | R <sub>1</sub> = 0.0926, wR <sub>2</sub> = 0.3354                                                    |
| Largest diff. peak and hole /e.Å <sup>-3</sup>                         | 1.95/-0.79                                                                     | 2.23/-1.81                                                                     | 2.09/-1.35                                                                                           |

$$^a R_1 = \frac{\sum ||F_o| - |F_c||}{\sum |F_o|}$$

$$^b wR_2 = \left\{ \frac{\sum [w(F_o^2 - F_c^2)^2]}{\sum [w(F_o^2)^2]} \right\}^{1/2}, [F_o > 4\sigma(F_o)]$$

## Section 4. General characterizations

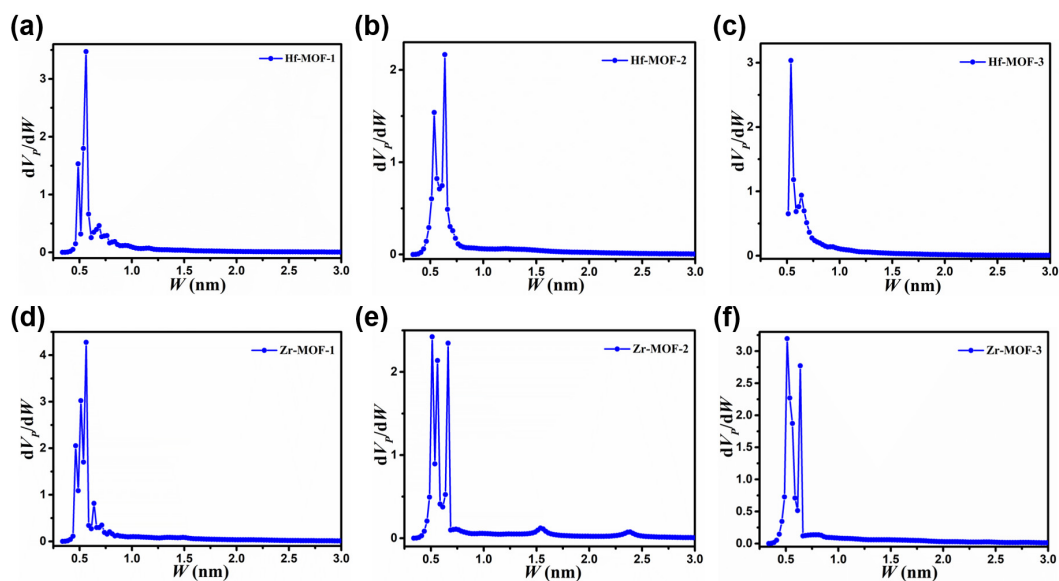

**Fig. S13.** Pore size distributions of (a) Hf-MOF-1, (b) Hf-MOF-2, (c) Hf-MOF-3, (d) Zr-MOF-1, (e) Zr-MOF-2, and (f) Zr-MOF-3.

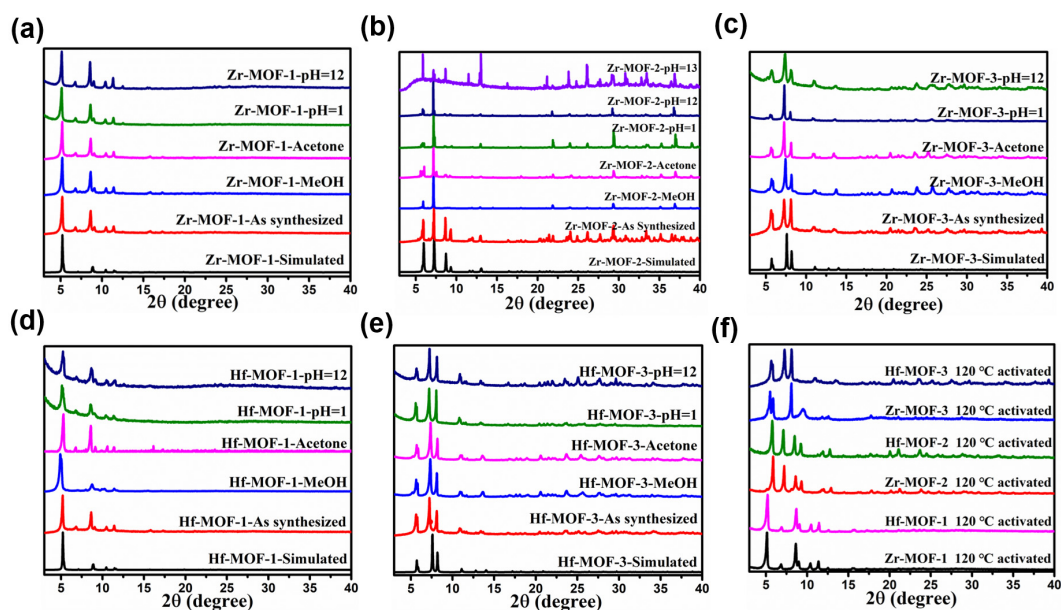

**Fig. S14.** PXRD patterns of Zr/Hf-MOFs (a-e) soaked in different organic solvents and treated with aqueous solutions at different pH values. (f) PXRD patterns of the MOFs activated overnight at 120 °C in a vacuum oven.

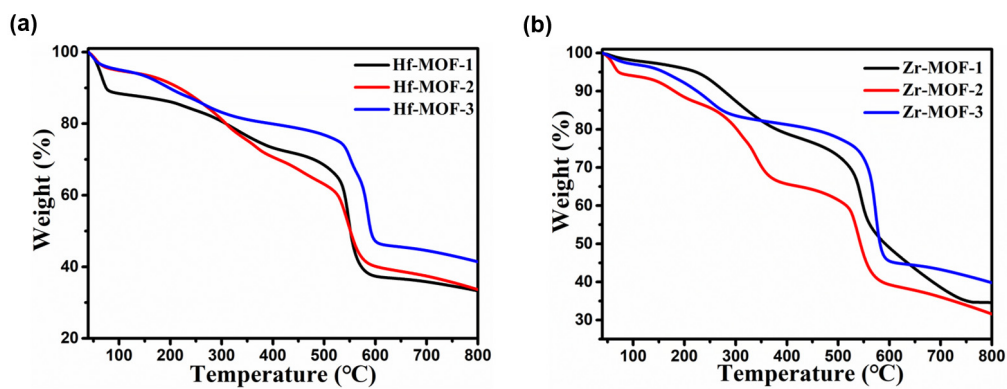

**Fig. S15.** Thermogravimetric analysis of (a) Hf-MOFs and (b) Zr-MOFs.

## Section 5. Adsorption of $\text{Cr}_2\text{O}_7^{2-}$

**Table S3.** ICP-AES results<sup>[a]</sup> for Hf-MOF-2- $\text{Cr}_2\text{O}_7^{2-}$  and Zr-MOF-2- $\text{Cr}_2\text{O}_7^{2-}$ .

|             |   | $\rho(\text{Hf/Zr}) / \text{ppm}$ | $\rho(\text{Cr}) / \text{ppm}$ | ratio |
|-------------|---|-----------------------------------|--------------------------------|-------|
| Hf-MOF-2-Cr | 1 | 30.533                            | 5.832                          | 1.525 |
|             | 2 | 36.153                            | 7.093                          | 1.485 |
|             | 3 | 42.924                            | 8.392                          | 1.490 |
| Zr-MOF-2-Cr | 1 | 23.876                            | 7.108                          | 1.915 |
|             | 2 | 27.467                            | 8.080                          | 1.938 |

<sup>[a]</sup> All data are from different batches of prepared samples to ensure the reproducibility

**Table S4.** Comparison of detection and adsorption capacities for  $\text{Cr}_2\text{O}_7^{2-}$  of selected porous materials.

| MOF Adsorbents                        | Maximum Capacity (mg /g) | The SC-to SC process | Recyclability | Quenching constant( $\text{M}^{-1}$ ) | LOD ( $\mu\text{M}$ ) | Reference                                                   |
|---------------------------------------|--------------------------|----------------------|---------------|---------------------------------------|-----------------------|-------------------------------------------------------------|
| Hf-MOF-3                              | 32                       | No                   | Yes           | $4.51 \times 10^5$                    | 0.013                 | <a href="#">This work</a>                                   |
| Zr-MOF-3                              | 30                       | No                   | Yes           | $6.37 \times 10^5$                    | 0.019                 | <a href="#">This work</a>                                   |
| Hf-MOF-2                              | 153                      | Yes                  | Yes           | $4.56 \times 10^4$                    | 0.188                 | <a href="#">This work</a>                                   |
| Zr-MOF-2                              | 149                      | Yes                  | Yes           | $3.5 \times 10^4$                     | 0.244                 | <a href="#">This work</a>                                   |
| Hf-MOF-1                              | 27                       | No                   | Yes           | $7.1 \times 10^4$                     | 0.138                 | <a href="#">This work</a>                                   |
| Zr-MOF-1                              | 28                       | No                   | Yes           | $6.2 \times 10^4$                     | 0.138                 | <a href="#">This work</a>                                   |
| 3D Ag-based MOF                       | 0.73 mol/mol             | Yes                  | NA            | NA                                    | NA                    | <i>Angew. Chem. Int. Ed.</i> , 2013, 52, 13769–13773.       |
| FIR-53                                | 74.2                     | Yes                  | NA            | NA                                    | NA                    | <i>Chem. Mater.</i> , 2015, 27, 205–210.                    |
| 1-Br                                  | 128                      | Yes                  | NA            | NA                                    | NA                    | <i>Chem. Commun.</i> , 2017, 53, 1860–1863.                 |
| ZJU-101                               | 245                      | No                   | Yes           | NA                                    | NA                    | <i>Chem. Commun.</i> , 2015, 51, 14732–14734.               |
| TJNU-244                              | 269                      | Yes                  | Yes           | NA                                    | NA                    | <i>ACS Appl. Mater. Interfaces</i> , 2019, 11, 42375–42384. |
| TJNU-243                              | 273                      | Yes                  | Yes           | NA                                    | NA                    | <i>ACS Appl. Mater. Interfaces</i> , 2019, 11, 42375–42384. |
| TJNU-334                              | 293                      | Yes                  | Yes           | NA                                    | NA                    | <i>ACS Appl. Mater. Interfaces</i> , 2019, 11, 42375–42384. |
| JLU-MOF50                             | 92                       | No                   | Yes           | $4.99 \times 10^4$                    | NA                    | <i>J. Mater. Chem. A</i> , 2018, 6, 6363–6369.              |
| BUT-39                                | 215                      | No                   | Yes           | $1.57 \times 10^4$                    | 1.5                   | <i>ACS Appl. Mater. Interfaces</i> 2018, 10, 16650–16659.   |
| Zr-BDC-( $\text{NH}_2$ ) <sub>2</sub> | 303                      | No                   | Yes           | NA                                    | NA                    | <i>J. Mater. Chem. A</i> , 2020, 8, 9629–9637.              |

|                                                                                                                              |       |    |     |                     |       |                                                                    |
|------------------------------------------------------------------------------------------------------------------------------|-------|----|-----|---------------------|-------|--------------------------------------------------------------------|
| Zr-BDC-(NH <sub>2</sub> ) <sub>2</sub> @PB                                                                                   | 208   | No | Yes | NA                  | NA    | <i>J. Mater. Chem. A</i> , 2020, <b>8</b> , 9629-9637.             |
| NU-1000                                                                                                                      | 76.80 | No | Yes | $1.34 \times 10^4$  | 1.8   | <i>Inorg. Chem.</i> , 2017, <b>56</b> , 14178-14188.               |
| Zn-MOF-1                                                                                                                     | NA    | No | Yes | $2.07 \times 10^4$  | 3.53  | <i>J. Mater. Chem. A</i> , 2017, <b>5</b> , 20035-20043.           |
| [Zn <sub>2</sub> (TPOM)(NDC) <sub>2</sub> ]<br>· 3.5H <sub>2</sub> O                                                         | NA    | No | Yes | $9.21 \times 10^3$  | 2.35  | <i>Inorg. Chem.</i> , 2017, <b>56</b> , 12348-12356                |
| [Eu(ipbp) <sub>2</sub> (H <sub>2</sub> O) <sub>3</sub> ]Br·<br>6H <sub>2</sub> O                                             | NA    | No | Yes | $8.98 \times 10^3$  | NA    | <i>J. Mater. Chem. C</i> , 2017, <b>5</b> , 8999-9004.             |
| BUT-28                                                                                                                       | NA    | No | Yes | $1.02 \times 10^5$  | 0.12  | <i>Inorg. Chem.</i> , 2018, <b>57</b> , 14260-14268.               |
| [Y(BTC)(DMF) <sub>6</sub> ] <sub>n</sub> :<br>0.1Eu                                                                          | NA    | No | NA  | $4.52 \times 10^3$  | 0.04  | <i>Microporous Mesoporous Mater.</i> , 2015, <b>217</b> , 196-202. |
| [Zn(btz)] <sub>n</sub>                                                                                                       | NA    | No | Yes | $4.23 \times 10^3$  | 2     | <i>CrystEngComm</i> , 2016, <b>18</b> , 4445-4451.                 |
| [Zn(ttz) H <sub>2</sub> O] <sub>n</sub>                                                                                      | NA    | No | Yes | $2.19 \times 10^3$  | 2     | <i>CrystEngComm</i> , 2016, <b>18</b> , 4445-4451.                 |
| [Zn(IPA)(3-PN)] <sub>n</sub>                                                                                                 | NA    | No | Yes | $1.37 \times 10^3$  | 12.02 | <i>Inorg. Chem.</i> , 2017, <b>56</b> , 2627-2638.                 |
| [Cd(IPA)(3-PN)] <sub>n</sub>                                                                                                 | NA    | No | Yes | $2.91 \times 10^3$  | 2.26  | <i>Inorg. Chem.</i> , 2017, <b>56</b> , 2627-2638.                 |
| {[Cd(4-BMPD)<br>(BPDC)]·2H <sub>2</sub> O} <sub>n</sub>                                                                      | NA    | No | NA  | $6.4 \times 10^3$   | 37.6  | <i>Cryst. Growth Des.</i> , 2017, <b>17</b> , 67-72.               |
| {[Cd(4-BMPD)<br>(SDBA)<br>(H <sub>2</sub> O)]·0.5H <sub>2</sub> O} <sub>n</sub>                                              | NA    | No | NA  | $4.97 \times 10^3$  | 48.6  | <i>Cryst. Growth Des.</i> , 2017, <b>17</b> , 67-72.               |
| [Eu <sub>2</sub> (tpbpc) <sub>4</sub> CO <sub>3</sub> ·H <sub>2</sub> O]·<br>DMF·solvent                                     | NA    | No | Yes | $1.04 \times 10^4$  | 1.07  | <i>Inorg. Chem.</i> , 2017, <b>56</b> , 4197-4205.                 |
| [Tb(hfac) <sub>3</sub> (NITPh-<br>Pa) <sub>2</sub> ][0.5CH <sub>3</sub><br>(CH <sub>2</sub> ) <sub>5</sub> CH <sub>3</sub> ] | NA    | No | NA  | $1.98 \times 10^4$  | 0.01  | <i>Polyhedron</i> , 2018, <b>144</b> , 101-106.                    |
| [Ag(btz) <sub>0.5</sub> (DCTP) <sub>0.5</sub> ] <sub>n</sub>                                                                 | NA    | No | NA  | $1.92 \times 10^4$  | 2.04  | <i>J. Mol. Struct.</i> , 2018, <b>1155</b> , 496-502.              |
| [Zn(2-NH <sub>2</sub> bdc)(bibp)] <sub>n</sub>                                                                               | NA    | No | NA  | $6.5 \times 10^6$   | NA    | <i>Inorg. Chem.</i> , 2015, <b>54</b> , 7133-7135.                 |
| [Zn <sub>2</sub> (tpeb)(bpdc)] <sub>2</sub>                                                                                  | NA    | No | Yes | $1.122 \times 10^4$ | 1.04  | <i>Inorg. Chem.</i> , 2020, <b>59</b> , 8818-8826.                 |
| Zr-BDC-(NH <sub>2</sub> ) <sub>2</sub>                                                                                       | 303   | No | Yes | NA                  | NA    | <i>J. Mater. Chem. A</i> , 2020, <b>8</b> , 9629-9637.             |
| Zr-BDC-(NH <sub>2</sub> ) <sub>2</sub> @PB                                                                                   | 432   | No | Yes | NA                  | NA    | <i>J. Mater. Chem. A</i> , 2020, <b>8</b> , 9629-9637              |
| [In <sub>3</sub> (ipbp) <sub>2</sub> (μ <sub>2</sub> -OH)<br>(μ <sub>2</sub> -O) <sub>3</sub> ]                              | 74.4  | No | Yes | NA                  | NA    | <i>Dalton Trans.</i> , 2020, <b>49</b> , 10613-10620               |
| UPC-48                                                                                                                       | 62.9  | No | Yes | NA                  | NA    | <i>Chem. Commun.</i> , DOI: 10.1039/d0cc04007j                     |
| UPC-49                                                                                                                       | 93.7  | No | Yes | NA                  | NA    | <i>Chem. Commun.</i> , DOI: 10.1039/d0cc04007j                     |
| UPC-50                                                                                                                       | 61.8  | No | Yes | NA                  | NA    | <i>Chem. Commun.</i> , DOI: 10.1039/d0cc04007j                     |

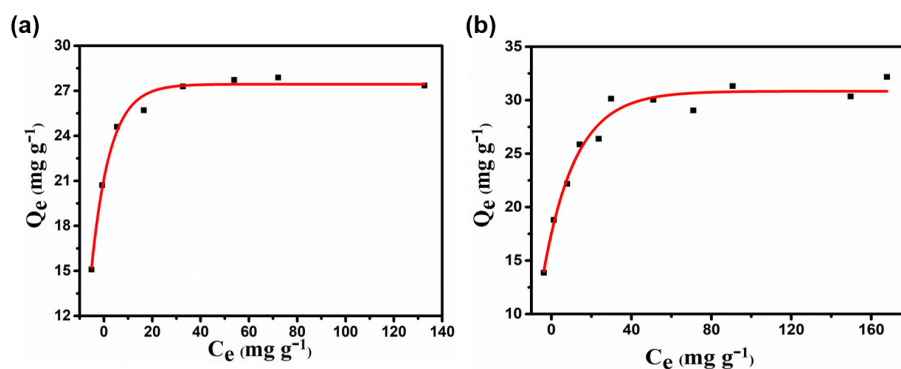

**Fig. S16.** Adsorption isotherm of  $\text{Cr}_2\text{O}_7^{2-}$  in (a) Hf-MOF-1 and (b) Hf-MOF-3.

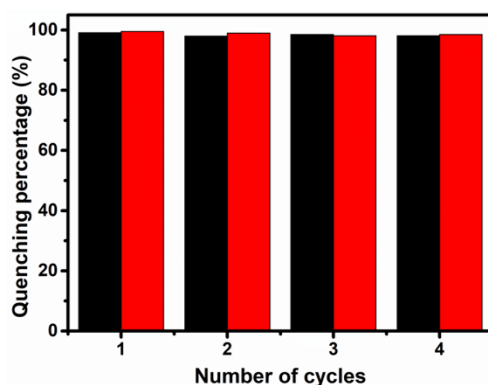

**Fig. S17.** The quenching efficiencies of Zr-MOF-2 (black) and Hf-MOF-2 (red) suspensions in four regeneration cycles.

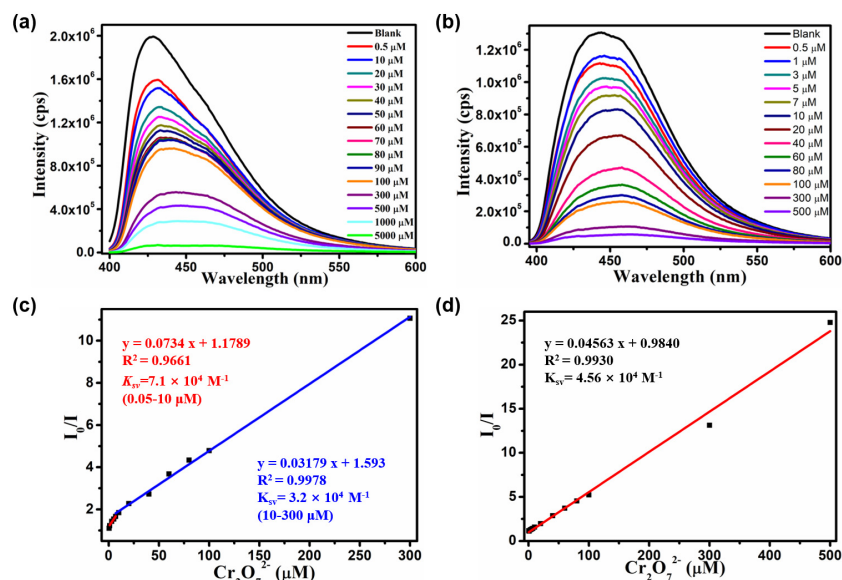

**Fig. S18.** Concentration-dependent luminescence emission spectra of (a) Hf-MOF-1 and (b) Hf-MOF-2 upon incremental addition of  $\text{Cr}_2\text{O}_7^{2-}$  (0.5, 1, 2, 3, 4, 5, 6, 7, 8, 9, 10, 20, 40, 60, 80, 100 and 300  $\mu\text{M}$ ). Stern–Volmer (S–V) plot of  $I_0/I$  versus  $\text{Cr}_2\text{O}_7^{2-}$  concentration from 0.0 to 300  $\mu\text{M}$  for (c) Hf-MOF-1 and (d) Hf-MOF-2.



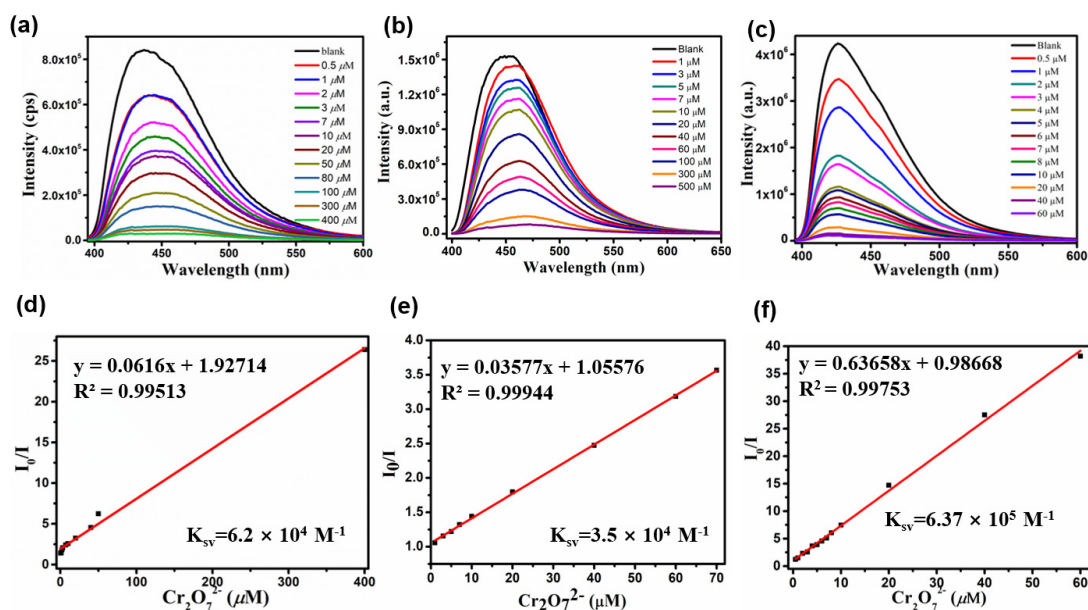

**Fig. S19.** Concentration-dependent luminescence emission spectra of (a) Zr-MOF-1, (b) Zr-MOF-2, and (c) Zr-MOF-3 upon incremental addition of  $\text{Cr}_2\text{O}_7^{2-}$  (0.5, 1, 2, 3, 4, 5, 6, 7, 8, 9, 10, 20, 40, 60, 80, 100 and 300  $\mu\text{M}$ ). Stern–Volmer (S–V) plot of  $I_0/I$  versus  $\text{Cr}_2\text{O}_7^{2-}$  concentration from 0.0 to 300  $\mu\text{M}$  for (d) Zr-MOF-1, (e) Zr-MOF-2, and (f) Zr-MOF-3.

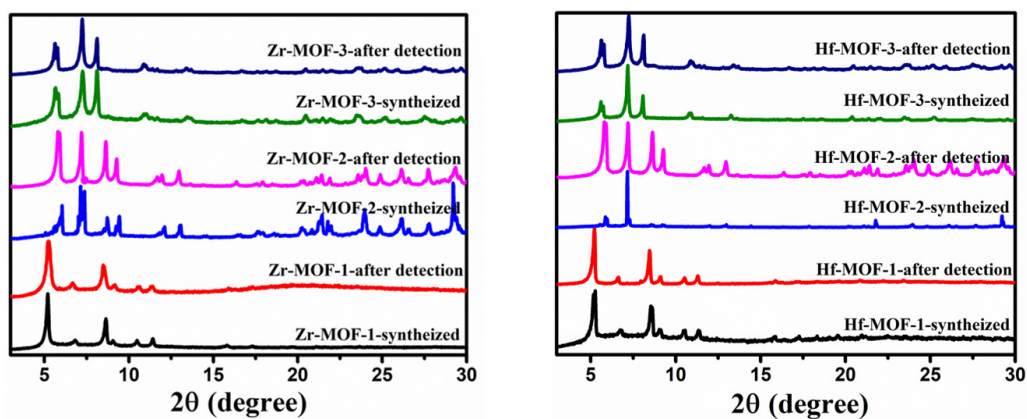

**Fig. S20.** PXRD patterns of Zr/Hf-MOFs before and after the detection of  $\text{Cr}_2\text{O}_7^{2-}$ .

## Section 6. Detection of $\text{Cr}_2\text{O}_7^{2-}$

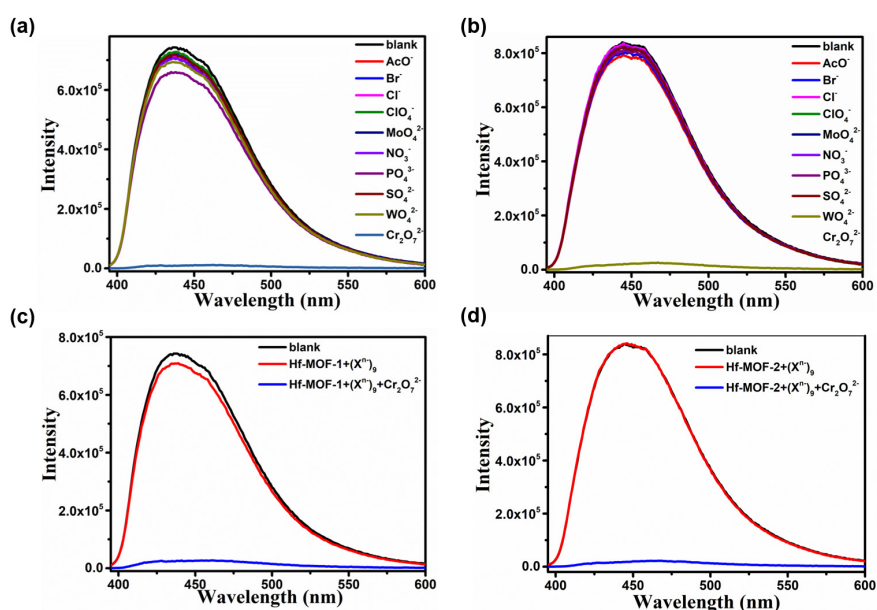

**Fig. S21.** Luminescent spectra of (a) Hf-MOF-1 and (b) Hf-MOF-2 suspensions in the presence of 0.5 mM different anions under excitation of 380 nm. Luminescent spectra of (c) Hf-MOF-1 and (d) Hf-MOF-2 suspensions upon the addition of  $\text{Cr}_2\text{O}_7^{2-}$  in the presence of nine anions ( $X = \text{AcO}^-$ ,  $\text{Br}^-$ ,  $\text{Cl}^-$ ,  $\text{ClO}_4^-$ ,  $\text{MoO}_4^{2-}$ ,  $\text{NO}_3^-$ ,  $\text{PO}_4^{3-}$ ,  $\text{SO}_4^{2-}$ , and  $\text{WO}_4^{2-}$ , 0.05 mM for each anion).

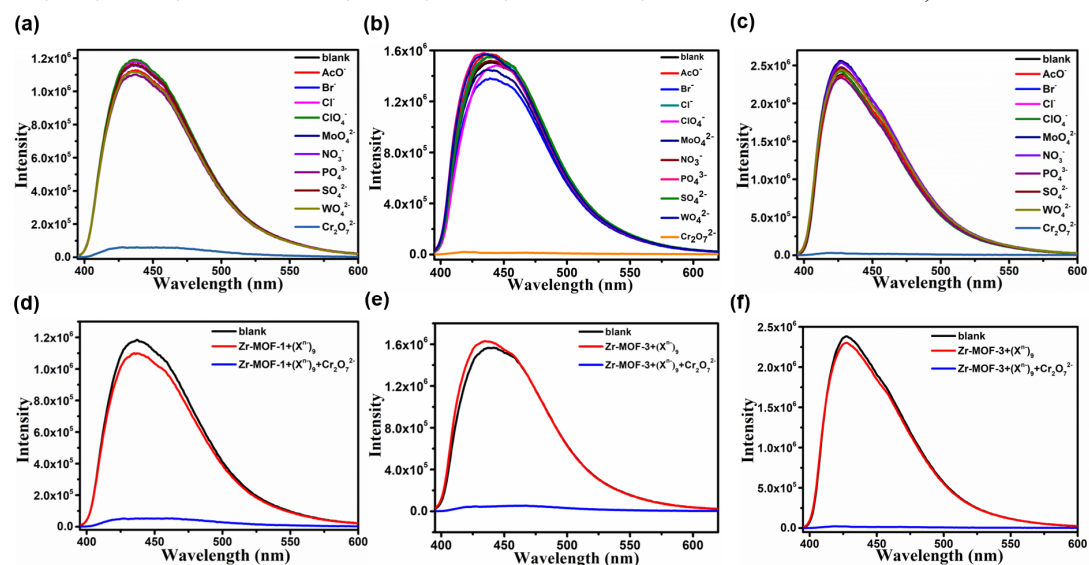

**Fig. S22.** Luminescent spectra of (a) Zr-MOF-1, (b) Zr-MOF-2, and (c) Zr-MOF-3 suspensions in the presence of 0.5 mM different anions under excitation of 380 nm. Luminescent spectra of (d) Zr-MOF-1, (e) Zr-MOF-2, and (f) Zr-MOF-3 upon the addition of  $\text{Cr}_2\text{O}_7^{2-}$  in the presence of nine anions ( $X = \text{AcO}^-$ ,  $\text{Br}^-$ ,  $\text{Cl}^-$ ,  $\text{ClO}_4^-$ ,  $\text{MoO}_4^{2-}$ ,  $\text{NO}_3^-$ ,  $\text{PO}_4^{3-}$ ,  $\text{SO}_4^{2-}$ , and  $\text{WO}_4^{2-}$ , 0.05 mM for each anion).

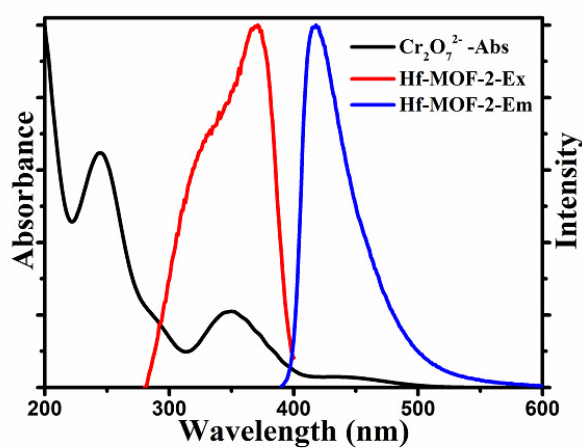

**Fig. S23.** Spectral overlap between the UV-vis absorption spectrum of  $\text{Cr}_2\text{O}_7^{2-}$ , excitation spectrum of Hf-MOF-2, and emission spectrum of Hf-MOF-2.

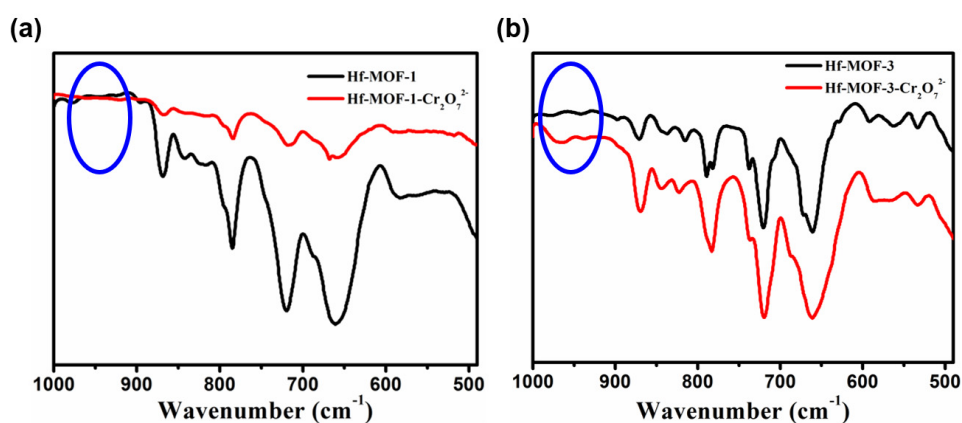

**Fig. S24.** FT-IR spectra of (a) Hf-MOF-1 and (b) Hf-MOF-3 before and after the adsorption of  $\text{Cr}_2\text{O}_7^{2-}$ .

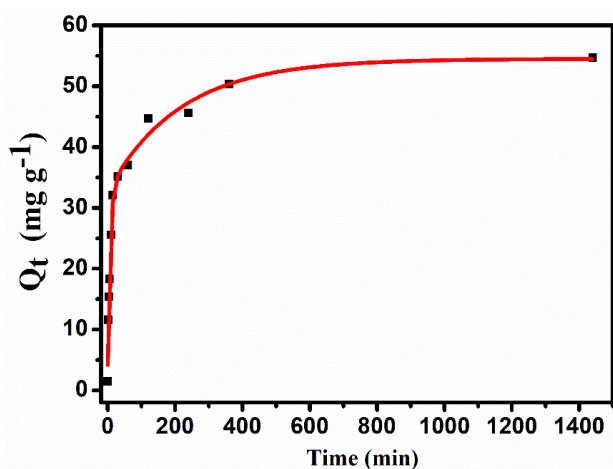

**Fig. S25.** Adsorption kinetics of  $\text{Cr}_2\text{O}_7^{2-}$  in Hf-MOF-2 with an initial concentration of 50 ppm.

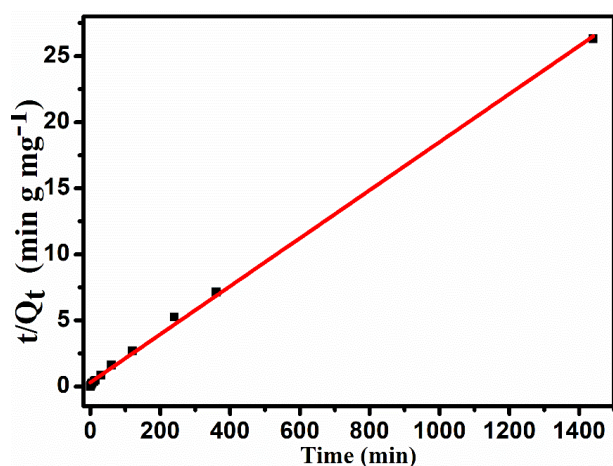

**Fig. S26.** The pseudo-second-order kinetic plot for the adsorption of  $\text{Cr}_2\text{O}_7^{2-}$  in Hf-MOF-2.

## References

1. Y. Jiang, L. Sun, J. Du, Y. Liu, H. Shi, Z. Liang and J. Li, *Cryst. Growth Des.*, 2017, **17**, 2090-2096.
2. L. Zhang, B. Guo, H. He, X. Zhang, Y. Feng, W. Fan, J. Cao, G. Lu, Y. Chen, D. Sun and W. Huang, *Inorg. Chem.*, 2020, **59**, 695-704.
3. J. Liu, Y. Ye, X. Sun, B. Liu, G. Li, Z. Liang and Y. Liu, *J. Mater. Chem. A*, 2019, **7**, 16833-16841.
4. J.-M. Liu, J.-X. Hou, J. Liu, X. Jing, L.-J. Li and J.-L. Du, *J. Mater. Chem. C*, 2019, **7**, 11851-11857.
